# Supplementary material
Source: PubMed Central journal article supplement (PMC3556193)
Supplement: NIHMS427683-supplement-Supp_Fig_S1-S6.pdf [file NIHMS427683-supplement-Supp_Fig_S1-S6.pdf]

Fig S1

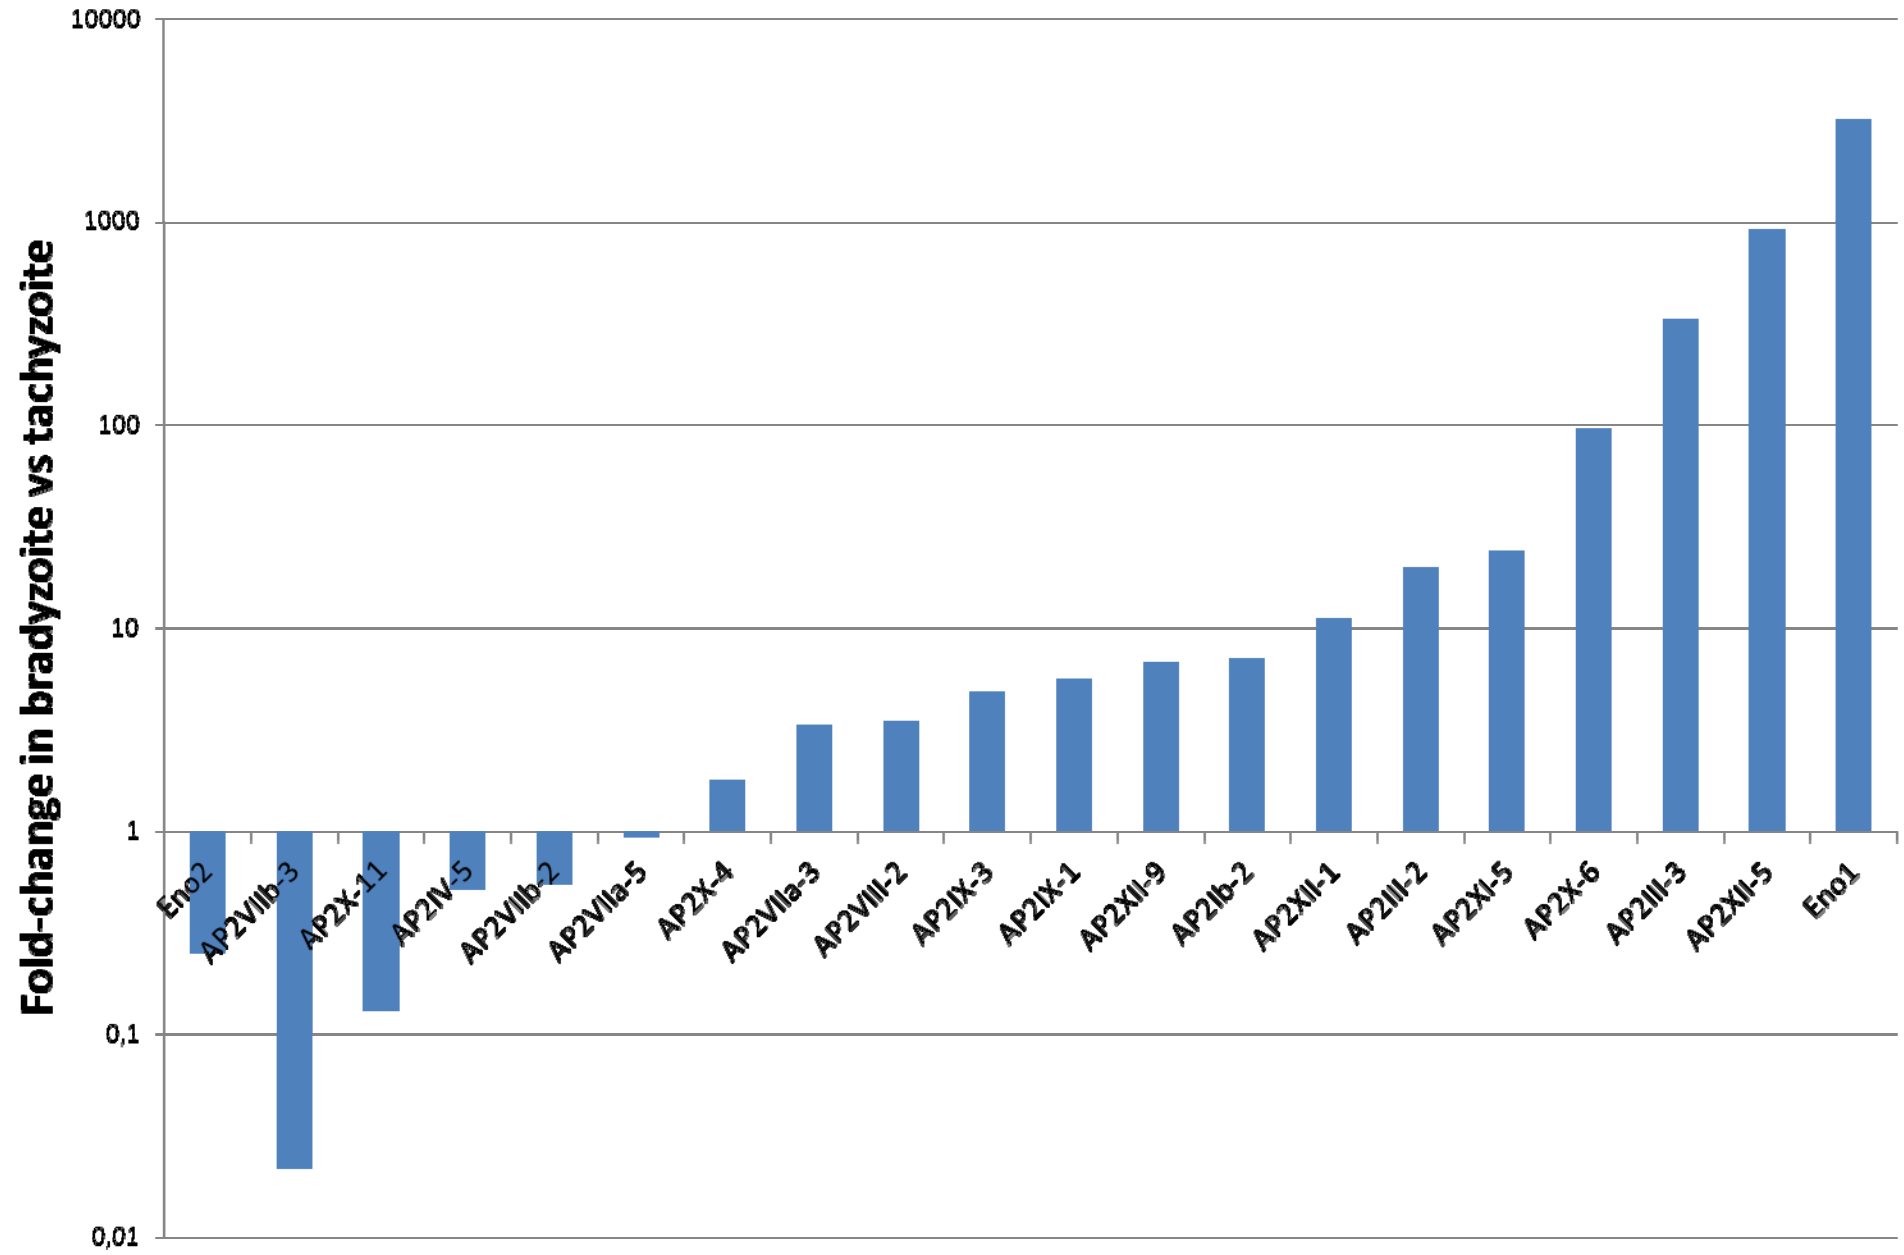

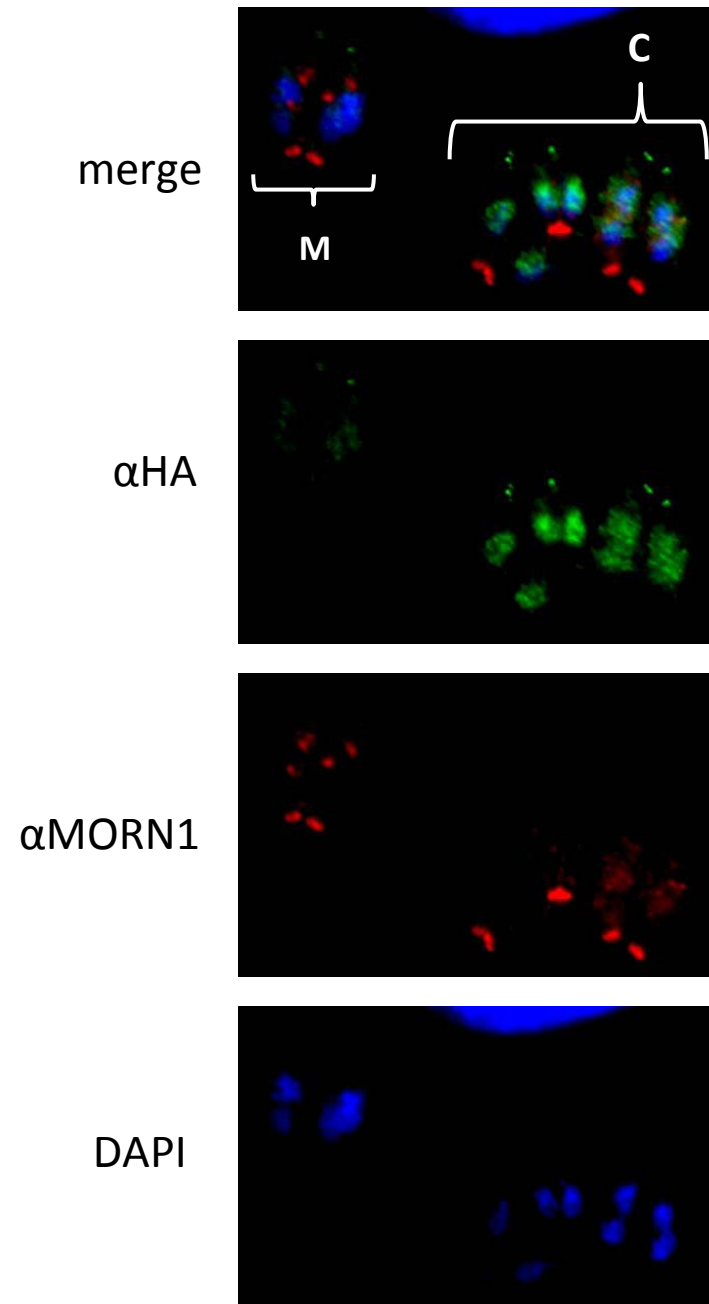

Fig S2

Fig S3A

|                                      |           |            |            |           |           |   |
|--------------------------------------|-----------|------------|------------|-----------|-----------|---|
| competitor CA(6) (pmol)              | -         | <b>2.5</b> | -          | <b>5</b>  | -         | - |
| non-specific competitor CA(6) (pmol) | -         | -          | <b>2.5</b> | -         | <b>5</b>  | - |
| TgAP2XI-4 protein (pmol)             | <b>40</b> | <b>40</b>  | <b>40</b>  | <b>40</b> | <b>40</b> | - |

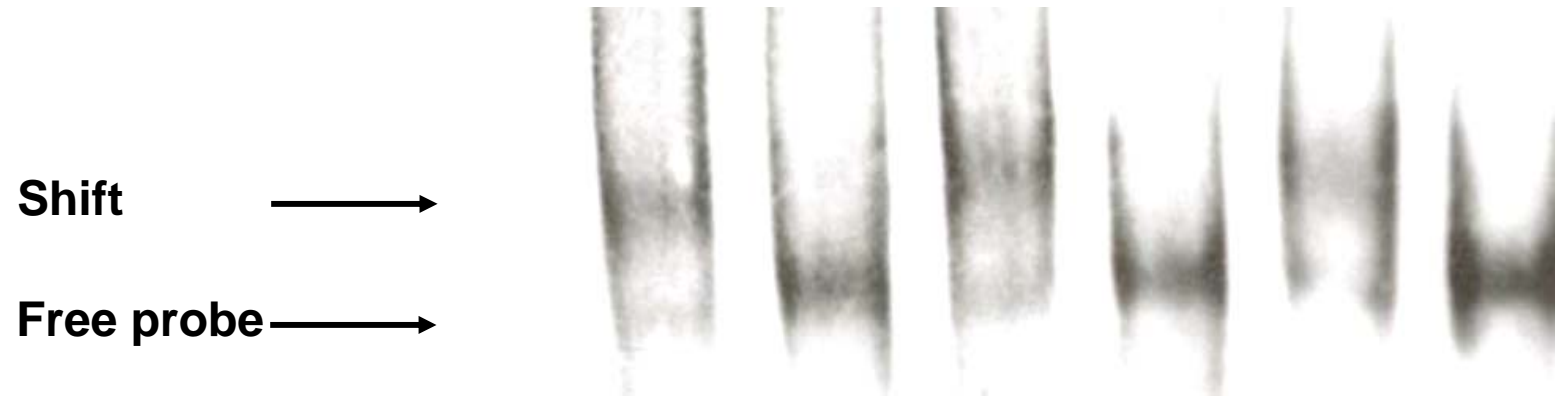

Fig S3B

|                                    |   |           |           |           |           |
|------------------------------------|---|-----------|-----------|-----------|-----------|
| Partially mutated competitor CA(5) | - | -         | <b>1</b>  | -         | -         |
| Partially mutated competitor CA(4) | - | -         | -         | <b>1</b>  | -         |
| Specific competitor CA(6)          | - | -         | -         | -         | <b>1</b>  |
| TgAP2XI-4 protein                  | - | <b>10</b> | <b>10</b> | <b>10</b> | <b>10</b> |

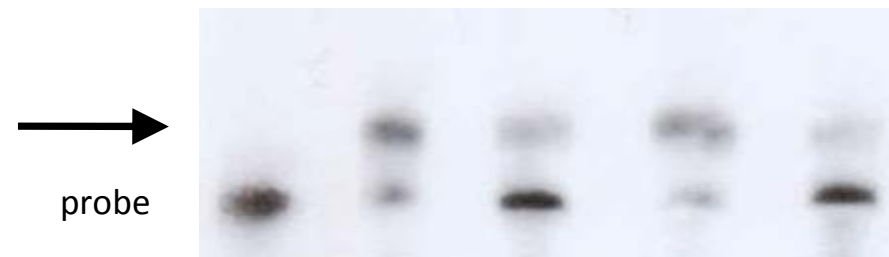

|                        |   |     |    |    |    |
|------------------------|---|-----|----|----|----|
| Relative intensity (%) | 0 | 100 | 58 | 87 | 30 |
| Competition (%)        | - | -   | 42 | 13 | 70 |

Fig S4A

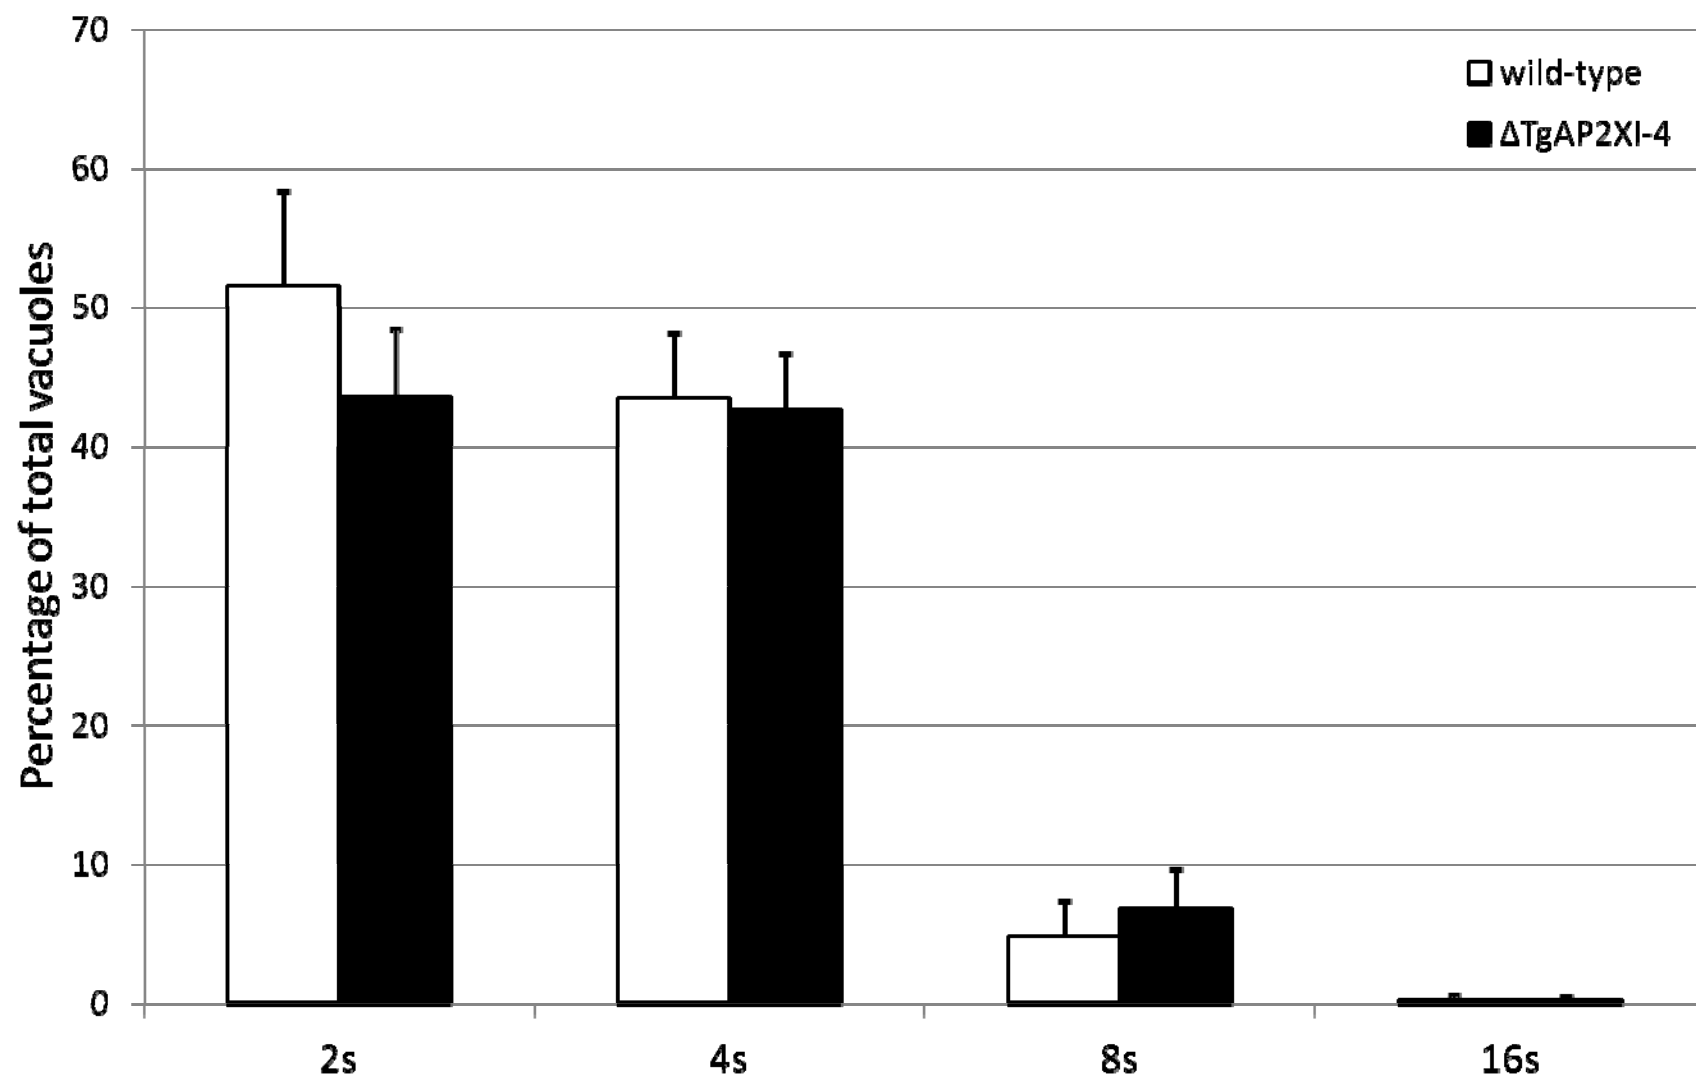

Fig S4B

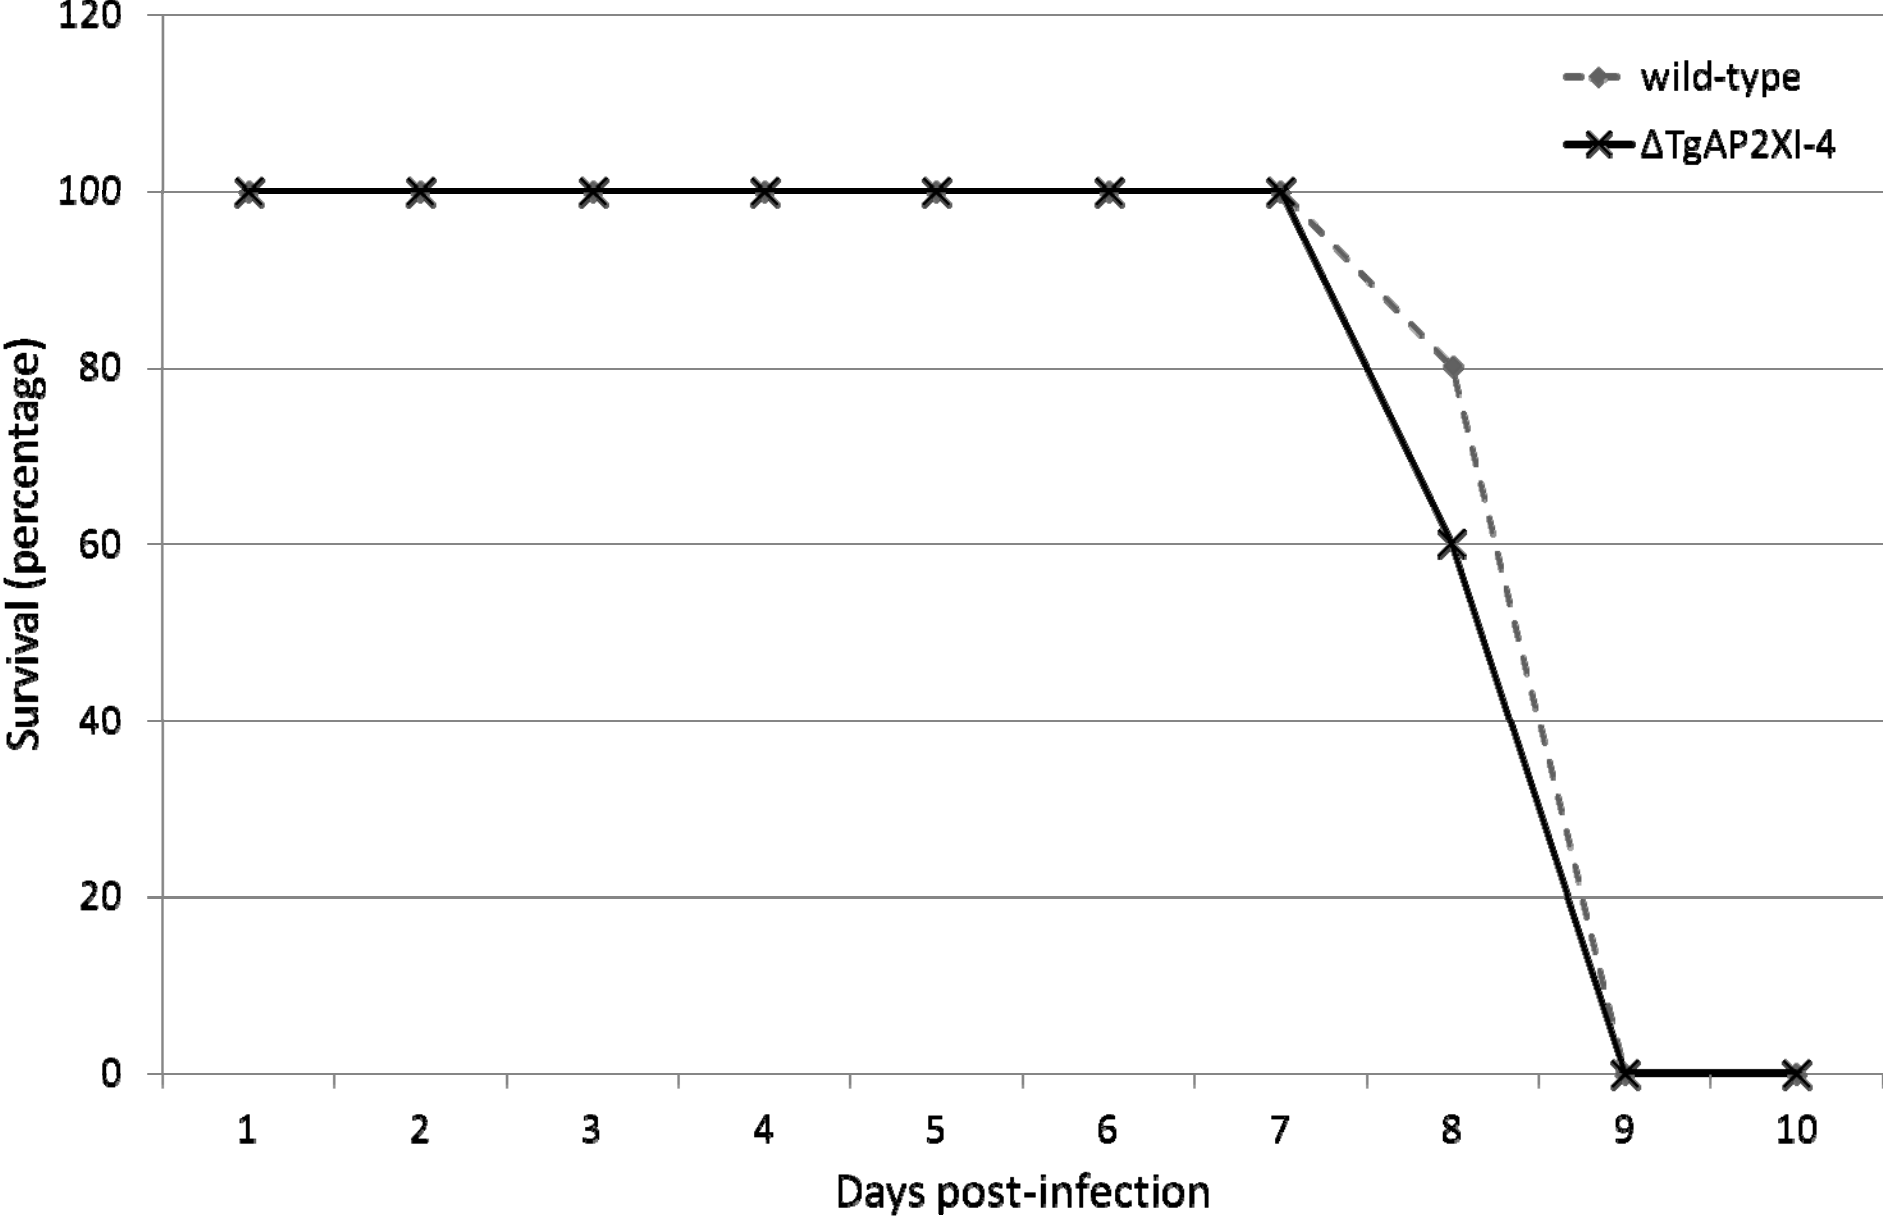

A

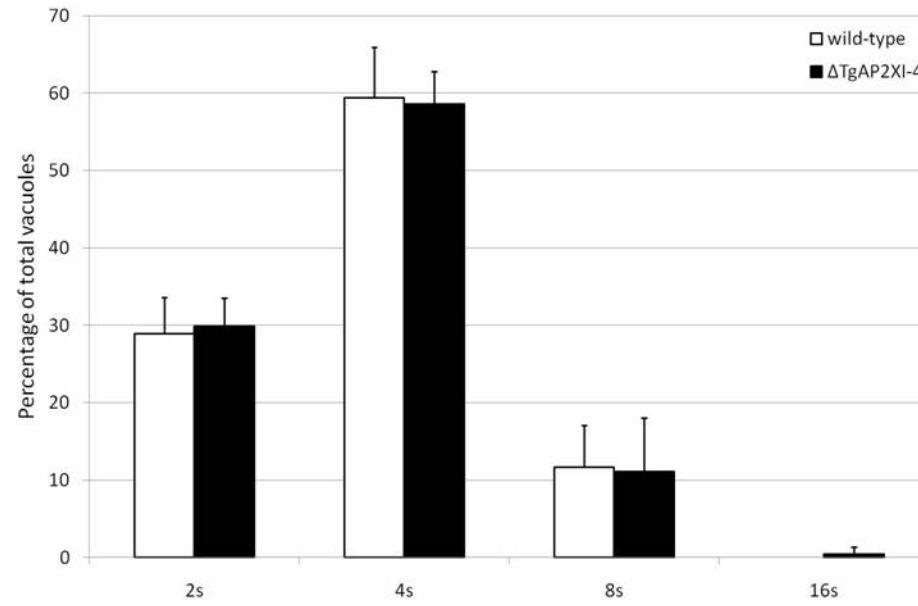

Fig S5

B

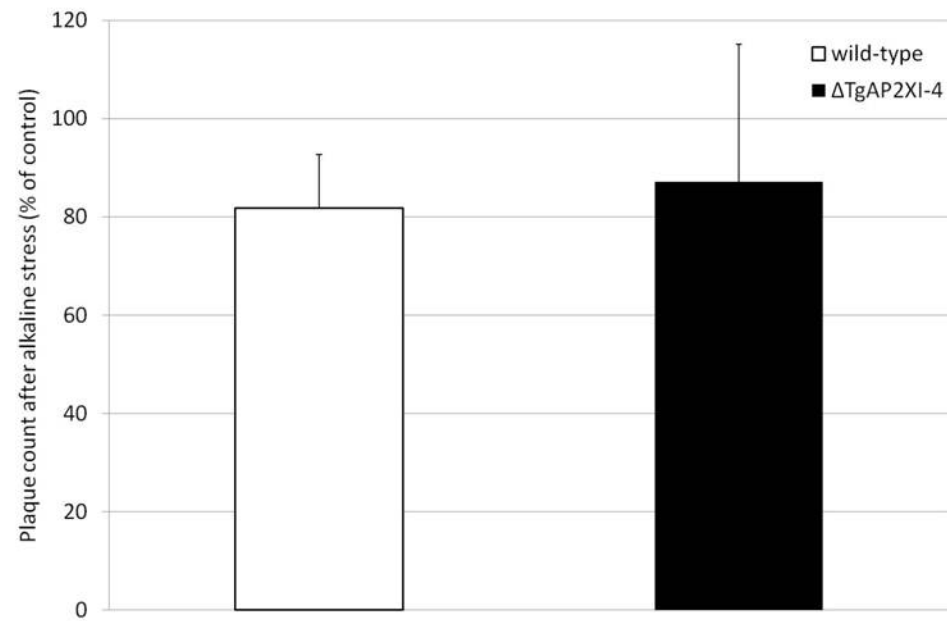

A

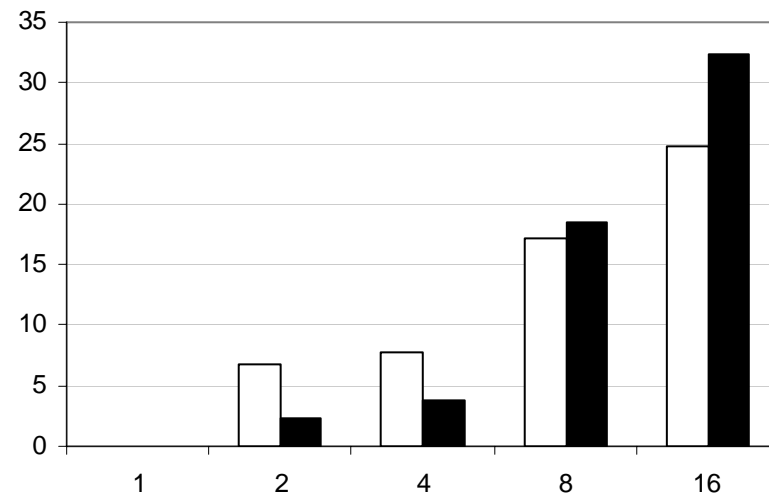

Fig S6

pH7 48h

B

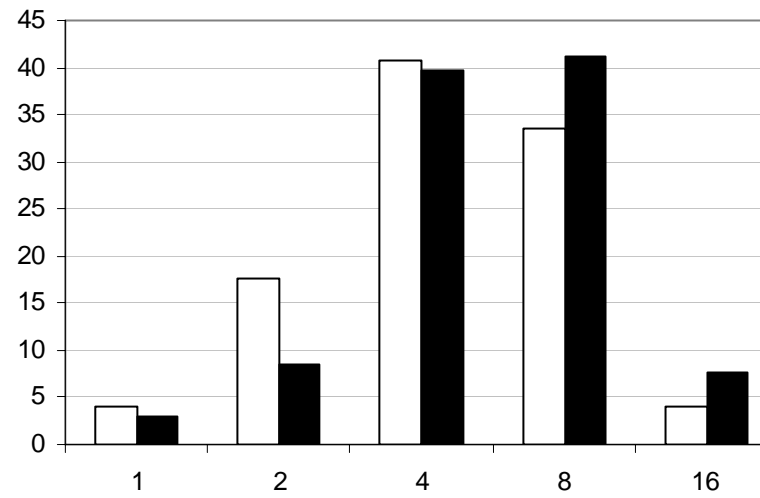

pH8.2 48h
